# Supplementary material
Source: PubMed Central journal article supplement (PMC3529057)
Supplement: 1212207110_pnas.201212207SI.pdf [file 1212207110_pnas.201212207SI.pdf]

# Supporting Information

Harris et al. 10.1073/pnas.1212207110

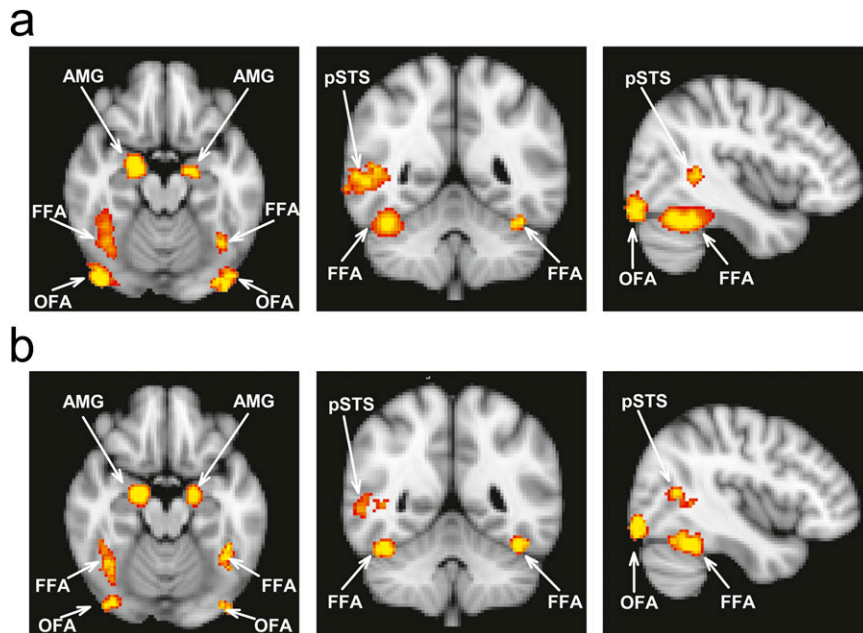

**Fig. S1.** Location of the face-selective regions of interest. (A) Experiment 1. (B) Experiment 2. The Montreal Neurological Institute (MNI) coordinates (millimeters) of slices:  $x = 42$ ,  $y = -50$ ,  $z = -18$ . FFA, fusiform face area; OFA, occipital face area; pSTS, posterior superior temporal sulcus; AMG, amygdala.

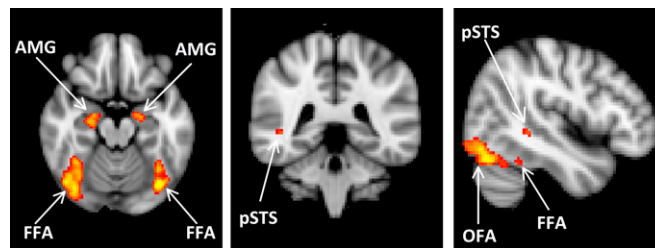

**Fig. S2.** Location of regions that were more responsive to different expression compared with the same expression faces in experiment 1. The MNI coordinates (millimeters) of slices:  $x = 46$ ,  $y = -40$ ,  $z = -18$ . Consistent with the ROI analysis, we found that the pSTS, amygdala (AMG), FFA, and OFA showed increased responses to different expression conditions compared with the same expression conditions. However, we did not find regions outside these core face-selective regions that showed selectivity for expression.

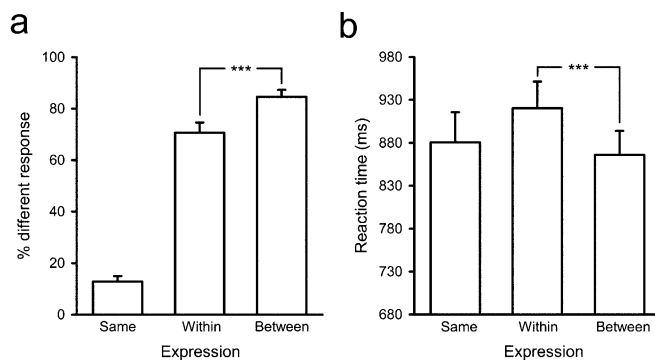

**Fig. S3.** Behavioral results from same/different experiment. (A) Proportion of "different" responses averaged across all participants for all three conditions. (B) Reaction time (milliseconds) for the correct responses, averaged across participants for the three conditions. These data show that facial expressions that differ in perceived emotion are discriminated more easily than facial expressions that are perceived to convey the same emotion. Error bars represent SE. \*\*\* $P < 0.001$ .



**Table S1. MNI coordinates of face-selective regions in experiments 1 and 2**

| Region   | Experiment 1 |           |           |           | Experiment 2 |           |           |           |
|----------|--------------|-----------|-----------|-----------|--------------|-----------|-----------|-----------|
|          | <i>n</i>     | <i>x</i>  | <i>y</i>  | <i>z</i>  | <i>n</i>     | <i>x</i>  | <i>y</i>  | <i>z</i>  |
| FFA      | 20           |           |           |           | 25           |           |           |           |
| L        |              | -40 (0.7) | -59 (1.8) | -23 (0.9) |              | -41 (0.8) | -56 (2.1) | -20 (0.9) |
| R        |              | 42 (0.9)  | -51 (1.3) | -24 (0.9) |              | 42 (0.8)  | -54 (1.2) | -22 (1.0) |
| OFA      | 20           |           |           |           | 20           |           |           |           |
| L        |              | -41 (1.8) | -84 (1.6) | -17 (1.8) |              | -40 (1.6) | -85 (1.4) | -15 (1.8) |
| R        |              | 44 (1.7)  | -78 (1.6) | -17 (1.3) |              | 41 (1.2)  | -83 (1.1) | -12 (1.1) |
| STS      | 18           |           |           |           | 17           |           |           |           |
| R        |              | 55 (0.9)  | -50 (2.0) | 3 (1.5)   |              | 51 (1.6)  | -48 (2.0) | 5.3 (1.2) |
| Amygdala | 15           |           |           |           | 21           |           |           |           |
| L        |              | -18       | -9        | -19       |              | -19       | -9        | -15       |
| R        |              | 22        | -6        | -19       |              | 20        | -8        | -17       |

MNI coordinates are in millimeters. SE is reported in parentheses.

**Table S2. MNI coordinates and size of regions that were more responsive to different expression compared with same-expression faces in experiment 1**

| Region   | <i>x</i> | <i>y</i> | <i>z</i> | Voxels |
|----------|----------|----------|----------|--------|
| FFA      |          |          |          |        |
| L        | -38      | -55      | -22      | 218    |
| R        | 38       | -58      | -22      | 480    |
| OFA      |          |          |          |        |
| L        | -38      | -71      | -21      | 290    |
| R        | 42       | -74      | -16      | 624    |
| STS      |          |          |          |        |
| L        | -49      | -46      | 0        | 4      |
| R        | 46       | -40      | -1.6     | 15     |
| Amygdala |          |          |          |        |
| L        | -19      | -10      | -17      | 55     |
| R        | 22       | -13      | -18      | 218    |

MNI coordinates are in millimeters.
